# Supplementary material for: Prevalence and Associated Risk Factors of Intestinal Parasitic Infections among Pregnant Women Attending Antenatal Care in Yifag Health Center, Northwest Ethiopia
Source: Hindawi journal article supplement (doi:10.1155/2021/7291199), 2021-10-21
Supplement: f1 [file 7291199.f1.pdf]

ሳይንስ ኮሌጅ  
የድህረ ምረቃ ፕሮግራም ማህበረሰብ  
አገልግሎት ም/ዲን  
ባሕር ዳር ዩኒቨርሲቲ  
ባሕር ዳር - ኢትዮጵያ

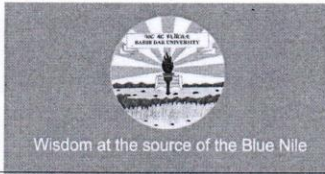

Science College  
The Graduate, Research  
& Community Services V/Dean  
Bahir Dar University  
Bahir Dar - Ethiopia

✉ 79

251 (582) 226 6597  
ፋክስ Fax: 251 (582) 220- 20- 25

e-mail: negatassie@yahoo.com  
website: www.bdu.edu.et

ቁጥር: **PGRCSVD/103/2012**

ቀን: 08/07/2012

### Ethical Clearance Approval Form

Applicant's Name: Minichil Liyih

|                         |                                                                                                                                                                  |
|-------------------------|------------------------------------------------------------------------------------------------------------------------------------------------------------------|
| Research Title          | Prevalence of intestinal parasites associated risk factors and its association with anaemia among pregnant women attending antenatal care in Yifag Health Center |
| Researcher (s) Name (s) | Minichil Liyih                                                                                                                                                   |

Thank you for submitting your application for ethical clearance, which was considered at the College of Science Research Ethics Committee meeting on 17 March 2020. The committee has reviewed your ethical application, issues pertaining to participants, consent form, debriefing, and relevant questionnaires.

The researcher should keep the confidentiality of the identity of research participants and data that will be obtained from them. Any serious adverse events or significant changes which occur in connection with this study and /or which may alter its ethical consideration must be reported immediately to the committee for a possible ethical amendment.

We are therefore pleased to inform you that the College's Ethical Clearance Committee has approved your study from an ethical point of view.

With kind regards

Dr. Tsegaye Kassa Gogte  
P.G.R.C.S. Vice Dean

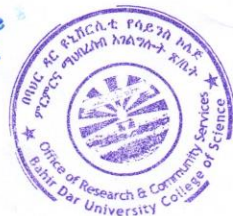

CC//

- Dean office
- The Graduate, Research and Community Services V/Dean
- Biology Department  
College of Science
